# Supplementary material for: Screening and Analysis of Possible Drugs Binding to PDGFRα: A Molecular Modeling Study
Source: MDPI journal article supplement (doi:10.3390/ijms24119623), 2023-06-01
Supplement: s1 [file s1]

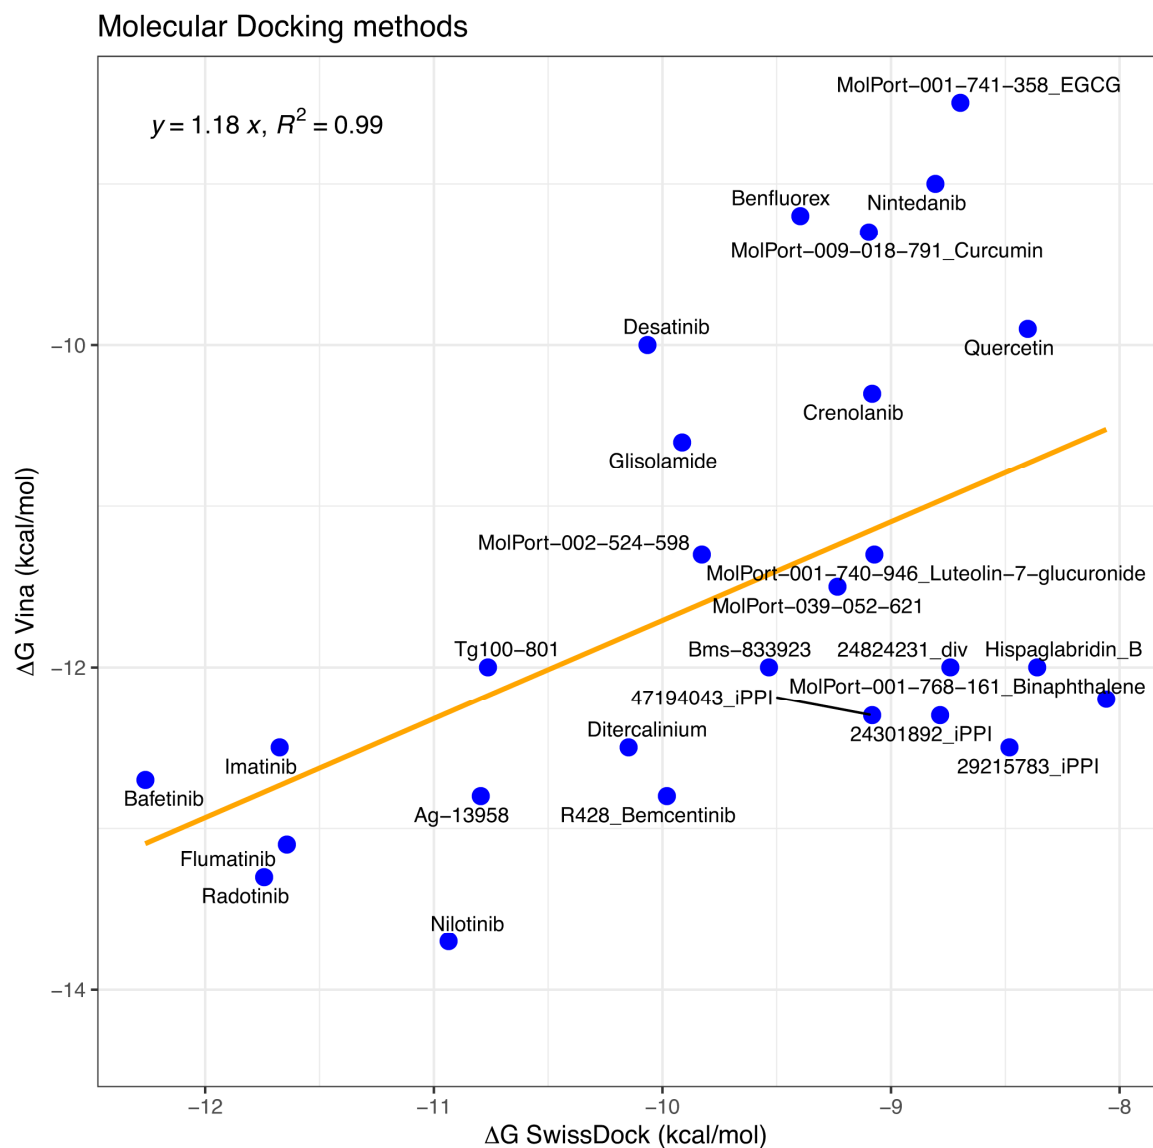

**Figure S1:** Correlation between the two molecular docking algorithms used (Autodock Vina-based docking genetic algorithm and EADock DSS algorithm).

**Tables S1–S5.** List of compounds included in the libraries used for structure-based virtual screening against the human intracellular PDGFR $\alpha$ .
